# Supplementary material
Source: Springer Nature journal article supplement (https://www.springermedizin.de/resource/supplementary/12937_2011_427_MOESM3_ESM.pdf/25653086)

■ low fat low sugar milk

■ high fat low sugar milk

■ high fat high sugar milk

■ low fat high sugar milk

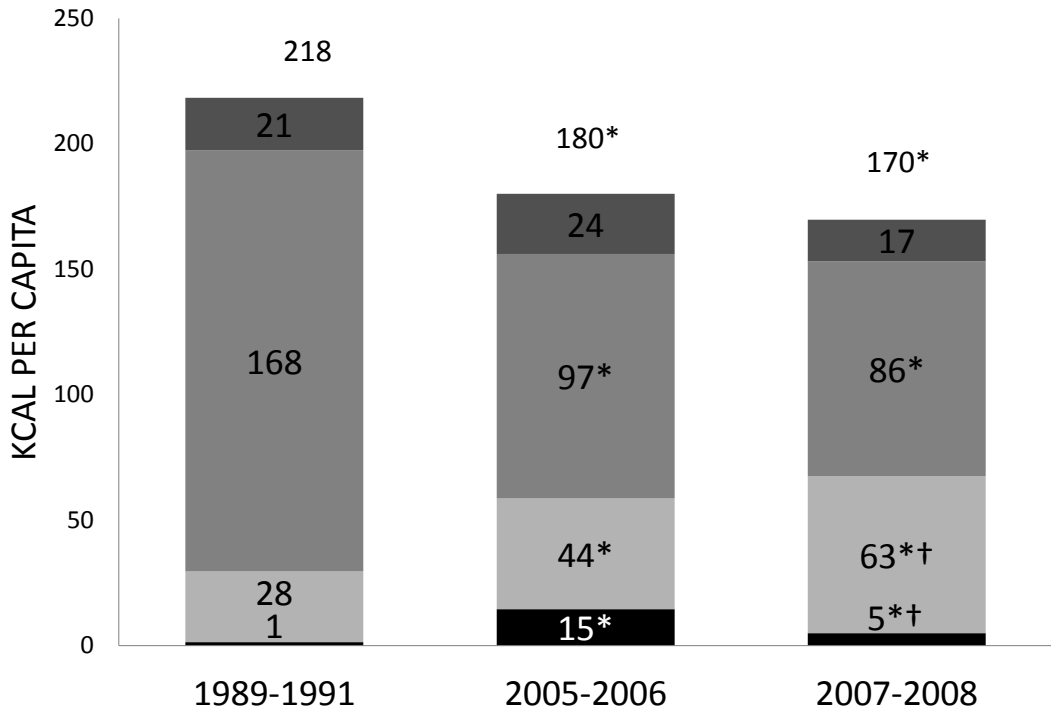

Supplement: MOESM3 [file 25653086]
